# Supplementary material for: Non-Targeted Metabolic Profiling of Cerebellum in Spina Bifida Fetal Rats
Source: MDPI journal article supplement (doi:10.3390/metabo13050670), 2023-05-19
Supplement: s1 [file s1]

## Supplementary

### Non-targeted metabolic profiling of cerebellum in spina bifida fetal rats

A.

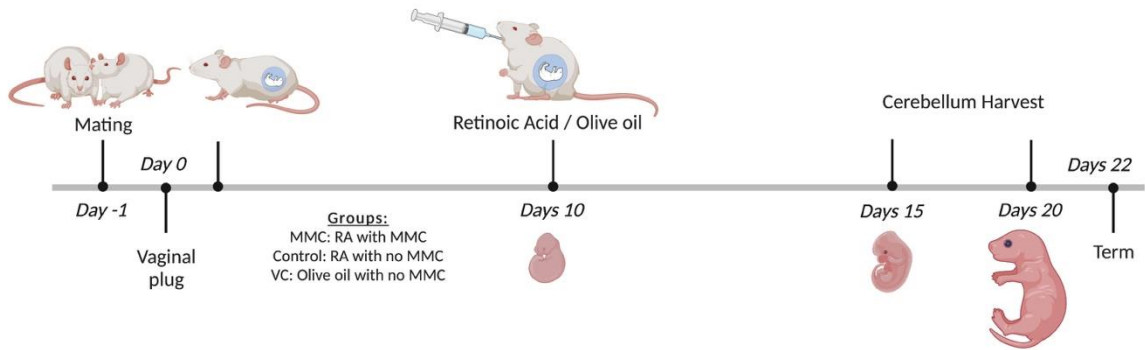

B.

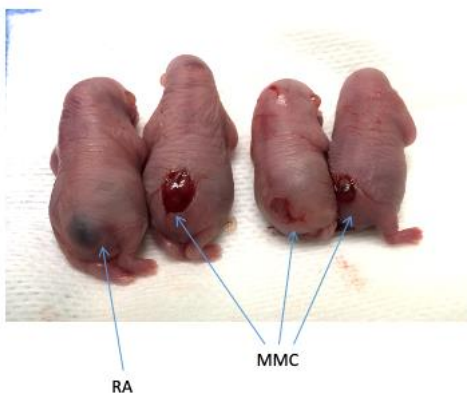

C.

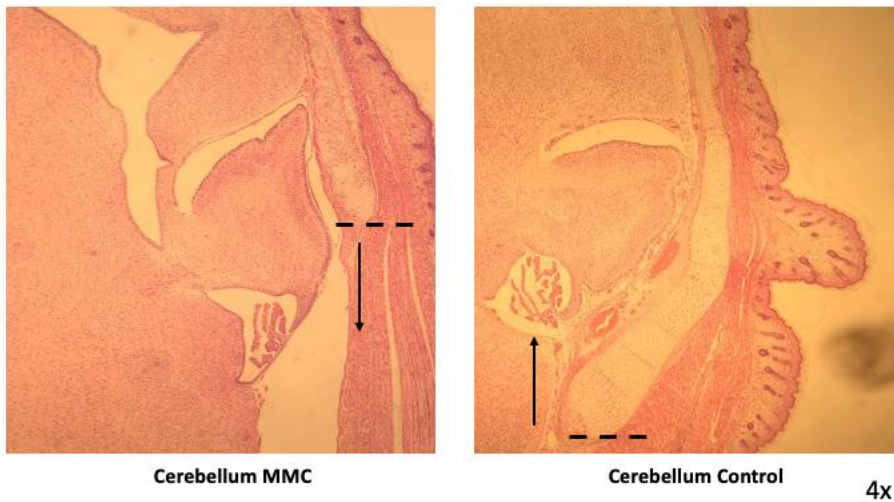

**Supplementary Figure S1:** A) Teratogenic congenital Retinoic Acid (RA)- Induced Spina Bifida rat model. B) Cerebellar tissue samples were collected and classified into one of three groups: spina bifida (labeled MMC), retinoic-acid sham (RA), or normal (VC) (not shown). C) Displacement of the cerebellum into the central canal in MMC rats compared to the Control. HE staining 4x

A.

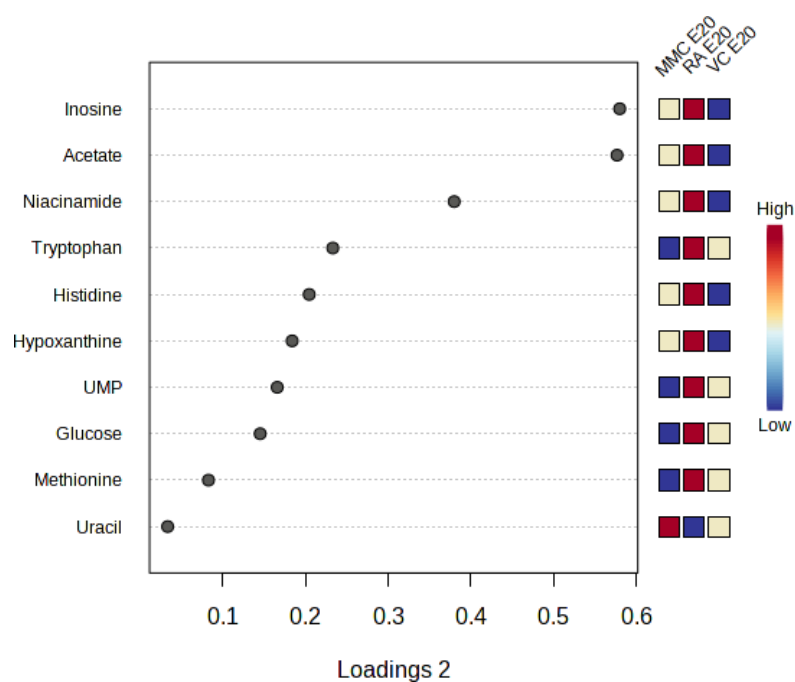

B.

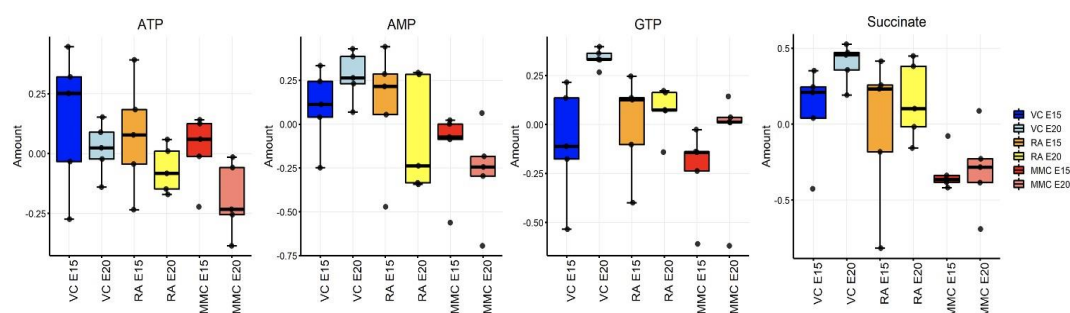

**Supplementary Figure S2:** A) Sparse partial least square discriminant analysis (sPLS-DA) loadings plot for Component 2 at late gestation (E20). B) Metabolites notable for RA contribution to variation between MMC and VC groups. Relative concentrations for four metabolites on sPLS-DA analysis at both mid (E15) and late (E20) gestation show potential for retinoic acid contribution to variations seen between VC and MMC groups.
